# Supplementary material
Source: Royal Society of Chemistry journal article supplement (doi:10.1039/d6tb00032k)
Supplement: d6tb00032k1.pdf [file d6tb00032k1.pdf]

# High-Specificity Kilobase-Level Multiplex PCR Enabled by Graphene Oxide-Dendrimer-Encapsulated Gold Nanoparticles

Dongqing Zhao,<sup>a</sup> Yao Lu,<sup>b</sup> Huanhuan Zong,<sup>a</sup> Yuxin Tang,<sup>a</sup> Chen Tang,<sup>a</sup> Meng Lu,<sup>a</sup>

Yuxun Zhou,<sup>a</sup> Kai Li,<sup>a</sup> Junhua Xiao<sup>a,\*</sup>

<sup>a</sup>College of Biological Science and Medical Engineering, Donghua University, Shanghai 201620, China

<sup>b</sup>State Key Laboratory for Modification of Chemical Fibers and Polymer Materials, College of Materials Science and Engineering, Donghua University, Shanghai 201620, China

\*Corresponding author E-mail: [xiaojunhua@dhu.edu.cn](mailto:xiaojunhua@dhu.edu.cn) (Prof. Junhua Xiao)

**Table S1.** Functional CYP450 loci selected as targets for multiplex PCR amplification.

| Gene   | SNP (rs ID) | Chromosome | Genomic position | CHB allele frequency | Allele | Drug / disease relevance                                                                             |
|--------|-------------|------------|------------------|----------------------|--------|------------------------------------------------------------------------------------------------------|
| CYP2C8 | rs11572103  | chr10      | 95,058,349       | 1.00                 | T      | Associated with paclitaxel metabolism <sup>1-3</sup>                                                 |
| CYP2A6 | rs1801272   | chr19      | 40,848,628       | 1.00                 | A      | Associated with nicotine metabolism, smoking addiction and withdrawal response <sup>4-6</sup>        |
| CYP2J2 | rs890293    | chr1       | 59,926,822       | 0.04 / 0.96          | A / C  | Associated with coronary heart disease, myocardial infarction and cardiovascular risk <sup>7-9</sup> |
| CYP1A2 | rs2069514   | chr15      | 74,745,879       | 0.72 / 0.28          | G / A  | Associated with myocardial infarction <sup>10</sup>                                                  |
| CYP2E1 | rs2070676   | chr10      | 133,537,633      | 0.19 / 0.81          | G / C  | Associated with alcohol metabolism and liver injury susceptibility <sup>11-14</sup>                  |
| CYP2B6 | rs8192709   | chr19      | 40,991,369       | 0.98 / 0.02          | C / T  | Associated with efavirenz metabolism <sup>15, 16</sup>                                               |
| CYP2   | rs1065      | chr22      | 42,130,692       | 0.40 /               | G /    | Associated with the metabolism                                                                       |

|             |        |       |            |        |     |                                                   |
|-------------|--------|-------|------------|--------|-----|---------------------------------------------------|
| <b>D6</b>   | 852    |       |            | 0.60   | A   | of codeine and $\beta$ -blockers <sup>17-20</sup> |
| <b>CYP2</b> | rs4986 | chr10 | 94,780,653 | 0.04 / | A / | Associated with clopidogrel                       |
| <b>C19</b>  | 893    |       |            | 0.96   | G   | metabolism <sup>21</sup>                          |

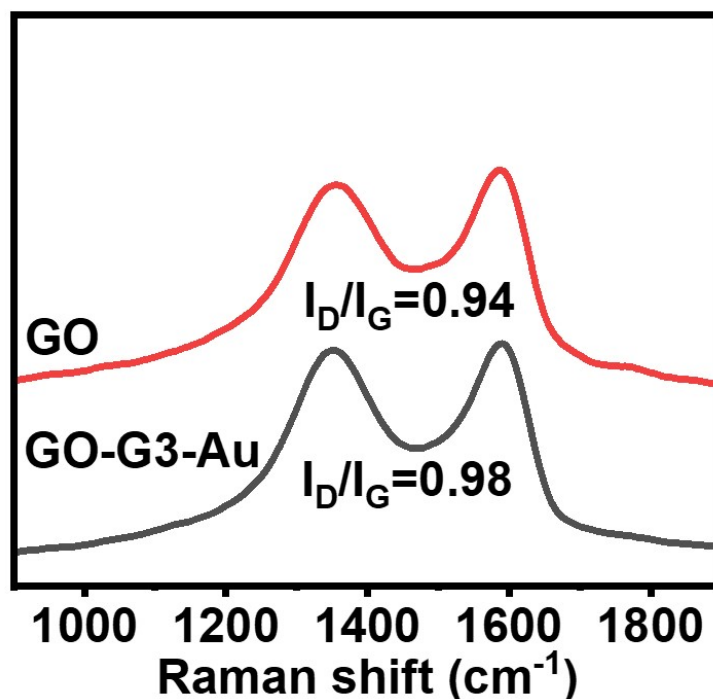

**Figure S1.** Raman spectra of graphene oxide (GO) and graphene oxide-dendrimer-encapsulated gold nanoparticles (GO-G3-Au).

**Table S2.** Comparative summary of PCR enhancement methods and the advantages of the GO-G3-Au system.

| Method / Reference           | Reported Enhancement                              | Limitation                                                        | Advantage of This Work                                                                                 |
|------------------------------|---------------------------------------------------|-------------------------------------------------------------------|--------------------------------------------------------------------------------------------------------|
| <b>Au/GO<sup>22</sup></b>    | 1.5–2.4× yield increase of short amplicons        | Mechanism speculative; lacking stability data                     | Achieved robust, high-yield and kb-level amplification with validated mechanism and material stability |
| <b>AuNPs@GO<sup>23</sup></b> | Enhanced specificity; 90 min single-plex reaction | No decoupled AuNPs@GO analysis; insufficient mechanistic evidence | Applied to higher-plex PCR with high specificity, faster reaction and mechanistic insight              |

|                                                                           |                                                                                                                                    |                                                  |                                                                                                    |
|---------------------------------------------------------------------------|------------------------------------------------------------------------------------------------------------------------------------|--------------------------------------------------|----------------------------------------------------------------------------------------------------|
| <b>(Au<sup>0</sup>)<sub>300</sub>-G5.NH<sub>2</sub>-mPEG<sup>24</sup></b> | Specificity ratio improved to 0.45–0.53, around 20% higher intensity                                                               | Marginal improvement; unclear mechanism          | Achieved high specificity (1.0) and high-yield amplification under challenging conditions          |
| <b>Molecular inversion probes<sup>25</sup></b>                            | Around 80% probe uniformity in non-model organisms                                                                                 | Limited by probe design and genomic interference | Superior multiplex uniformity, simplified operation, lower cost                                    |
| <b>GO-G3-Au (This work)</b>                                               | Greatly shortened kb-level multiplex PCR time (430→70 min) with improved specificity and multiplex uniformity ( $\Delta C_t < 4$ ) | Scalability and tolerance require further study  | Integrated electrostatic and thermal effects for highly specific, uniform, efficient amplification |

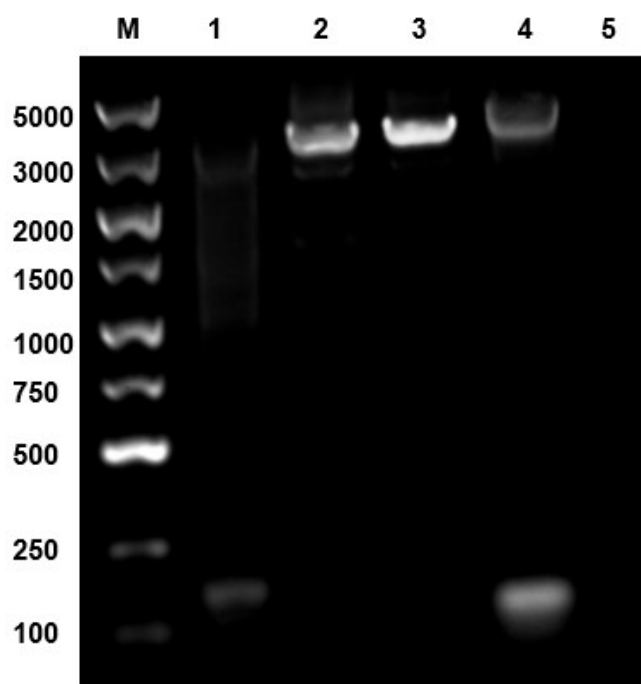

**Figure S2.** Electrophoresis results of semi-multiplex PCR performed using one forward primer and two reverse primers (matched and single-base mismatched) to evaluate the selective effect of GO-G3-Au on primer–template interactions. Lane 1 is the mismatched-primer-only group, lane 2 is the matched + mismatched primer group, lane 3 is the matched + mismatched primer group with GO-

G3-Au. Lane 4 is the matched-primer-only group. The final lane is the no-template control (NTC). M is the molecular weight marker, with units in bp. Data are representative of three independent experiments.

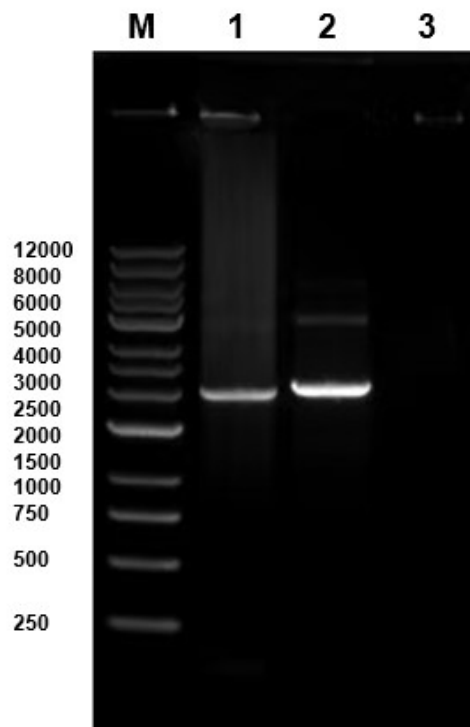

**Figure S3.** Electrophoresis results of a triplex mitochondrial PCR system with and without GO-G3-Au. Lane 1 is the PCR product without the nanomaterial, lane 2 is the PCR product with GO-G3-Au. Lane 3 is the NTC, and M is the molecular weight marker (bp). Data are representative of three independent experiments.

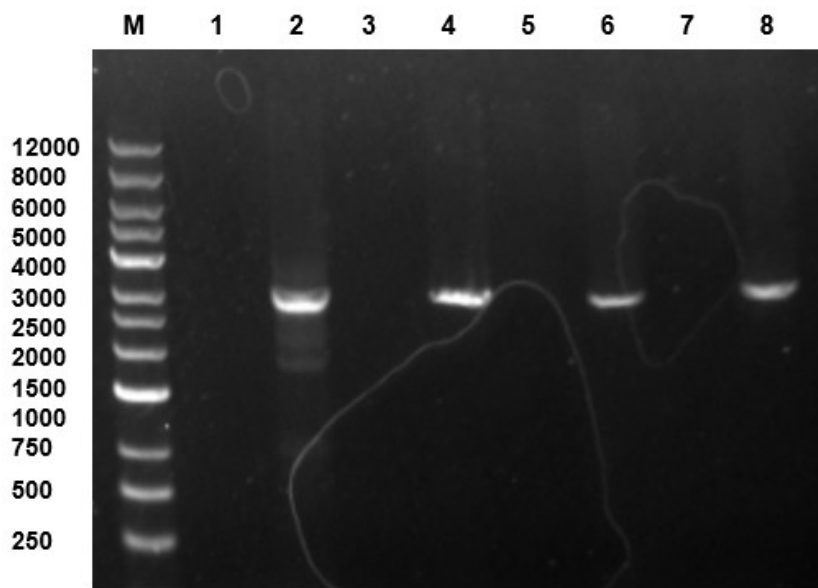

**Figure S4.** Evaluation of the long-term storage, freeze-thaw stability and experimental reproducibility of GO-G3-Au. Electrophoresis results of kb-level eight-plex PCR products amplified under different conditions: (Lanes 1 and 2) without nanomaterials, (Lanes 3 and 4) with freshly prepared GO-G3-Au, (Lanes 5 and 6) with GO-G3-Au stored at -20 °C for 5 months, and (Lanes 7 and 8) with GO-G3-Au subjected to three consecutive freeze-thaw cycles. The odd-numbered lanes (1, 3, 5, 7) represent the corresponding NTC for each reaction condition. Lane M: DNA marker (bp). These experiments were independently performed using different PCR instruments and by different operators, and comparable amplification patterns were obtained. Data are representative of three independent experiments.

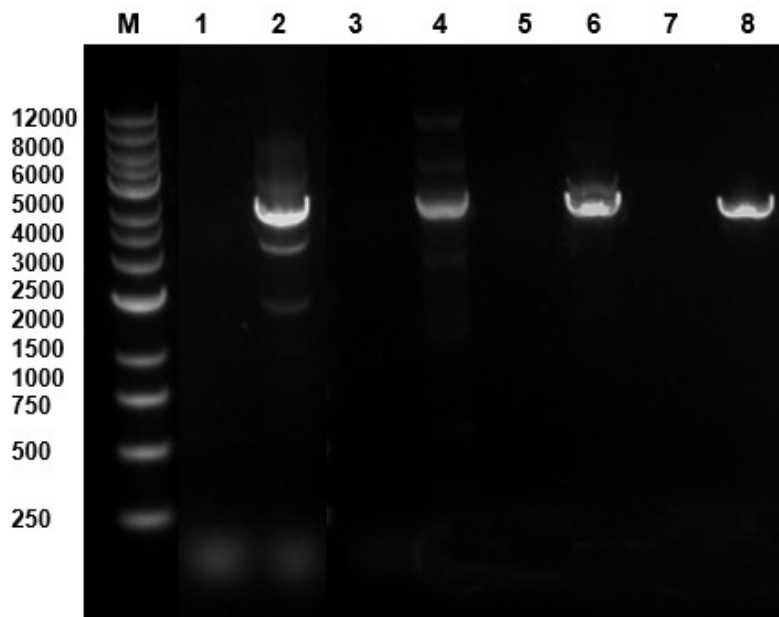

**Figure S5.** Electrophoresis results under different material conditions. Lanes 1, 3, 5 and 7: corresponding negative controls. Lane 2: PCR without nanomaterials. Lane 4: PCR with positively charged G3 dendrimer. Lane 6: PCR with thermally conductive AuNPs. Lane 8: PCR with GO-G3-Au composite. Lane M: DNA marker (bp). Data are representative of three independent experiments.

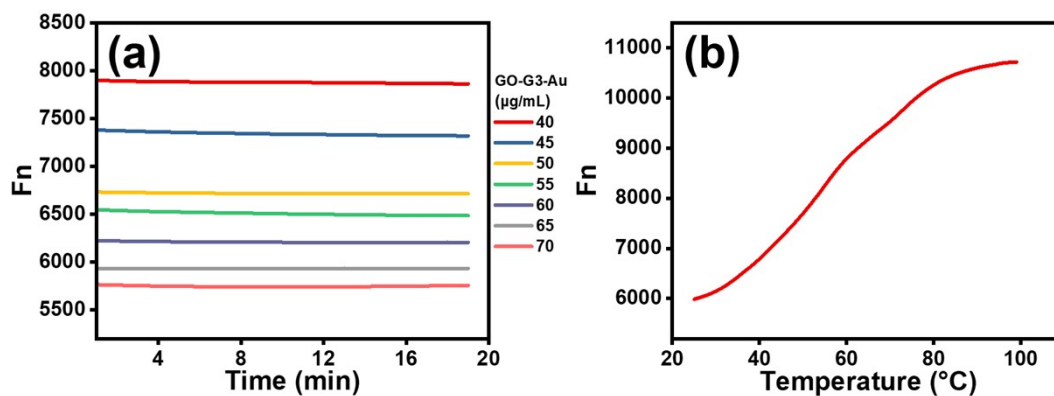

**Figure S6.** Fluorescence-based characterization of the interaction between FAM-labeled DNA and GO-G3-Au. (a) Time-dependent fluorescence quenching profiles of 0.4  $\mu\text{M}$  FAM-labeled DNA in the presence of GO-G3-Au at different concentrations (40–70  $\mu\text{g/mL}$ ) recorded at 25  $^{\circ}\text{C}$ . (b) Temperature-dependent fluorescence response of 0.4  $\mu\text{M}$  FAM-labeled DNA in the presence of GO-G3-Au (100  $\mu\text{g/mL}$ ) over the range of 25–100  $^{\circ}\text{C}$ .

## References

1. E. B. Daily and C. L. Aquilante, Cytochrome p450 2c8 pharmacogenetics: A review of clinical studies. *Pharmacogenomics*, 2009, 10, 1489–1510.
2. D. L. Hertz, S. Roy, A. A. Motsinger-Reif, A. Drobish, L. S. Clark, H. L. McLeod, L. A. Carey and E. C. Dees, Cyp2c8\*3 increases risk of neuropathy in breast cancer patients treated with paclitaxel. *Ann. Oncol.*, 2013, 24, 1472–1478.
3. D. Dai, D. C. Zeldin, J. A. Blaisdell, B. Chanas, S. J. Coulter, B. I. Ghanayem and J. A. Goldstein, Polymorphisms in human CYP2C8 decrease metabolism of the anticancer drug paclitaxel and arachidonic acid. *Pharmacogenetics*, 2001, 11, 597–607.
4. Z. Verde, C. Santiago, J. M. Rodriguez Gonzalez-Moro, P. de Lucas Ramos, S. Lopez Martin, F. Bandres, A. Lucia and F. Gomez-Gallego, 'Smoking genes': A genetic association study. *Plos One*, 2011, 6, e26668.
5. J.-A. Tanner, A. Z. Zhu, K. G. Claw, B. Prasad, V. Korchina, J. Hu, H. Doddapaneni, D. M. Muzny, E. G. Schuetz, C. Lerman, K. E. Thummel, S. E. Scherer and R. F. Tyndale, Novel CYP2A6 diplotypes identified through next-generation sequencing are associated with *in-vitro* and *in-vivo* nicotine metabolism. *Pharmacogenet. Genomics*, 2018, 28, 7–16.
6. N. Ezzeldin, D. El-Lebedy, A. Darwish, A. El Bastawisy, S. H. Abd Elaziz, M. M. Hassan and A. Saad-Hussein, Association of genetic polymorphisms CYP2A6\*2 rs1801272 and CYP2A6\*9 rs28399433 with tobacco-induced lung cancer: Case-control study in an egyptian population. *Bmc Cancer*, 2018, 18, 525.
7. M. M. Hoffmann, P. Bugert, U. Seelhorst, B. Wellnitz, B. R. Winkelmann, B. O. Boehms and W. Maerz, The-50G>T polymorphism in the promoter of the CYP2J2 gene in coronary heart disease:

- The ludwigshafen risk and cardiovascular health study. *Clin. Chem.*, 2007, 53, 539–540.
8. J. Boergel, D. Bulut, C. Hanefeld, H. Neubauer, A. Muegge, J. T. Epplen, T. Holland-Letz and M. Spiecker, The CYP2J2 g-50t polymorphism and myocardial infarction in patients with cardiovascular risk profile. *BMC Cardiovasc. Disord.*, 2008, 8, 41.
  9. A. S. A. Kumar, S. S. Kumar, G. Umamaheswaran, R. Kesavan, J. Balachandar and C. Adithan, Association of CYP2C8, CYP2C9 and CYP2J2 gene polymorphisms with myocardial infarction in south indian population. *Pharmacol. Rep.*, 2015, 67, 97–101.
  10. M. C. Cornelis, A. El-Soheily and H. Campos, Genetic polymorphism of CYP1A2 increases the risk of myocardial infarction. *J. Med. Genet.*, 2004, 41, 758–762.
  11. Y. Lu and A. I. Cederbaum, Cytochrome p450s and alcoholic liver disease. *Curr. Pharm. Des.*, 2018, 24, 1502–1517.
  12. T. Liu, F. Zhang, Y. Feng, P. Han and Y. Gao, Alcohol-metabolizing enzymes, liver diseases and cancer. *Semin. Liver Dis.*, 2025, 45, 99–113.
  13. L. Kaphalia and W. J. Calhoun, Alcoholic lung injury: Metabolic, biochemical and immunological aspects. *Toxicol. Lett.*, 2013, 222, 171–179.
  14. J.-W. Yun, M.-J. Son, M. A. Abdelmegeed, A. Banerjee, T. R. Morgan, S.-H. Yoo and B.-J. Song, Binge alcohol promotes hypoxic liver injury through a CYP2E1-hif-1 $\alpha$ -dependent apoptosis pathway in mice and humans. *Free Radical Biol. Med.*, 2014, 77, 183–194.
  15. E. M. McDonagh, J. L. Lau, M. L. Alvarellos, R. B. Altman and T. E. Klein, Pharmgkb summary: Efavirenz pathway, pharmacokinetics. *Pharmacogenet. Genomics*, 2015, 25, 363–376.
  16. J. D. Robarge, I. F. Metzger, J. Lu, N. Thong, T. C. Skaar, Z. Desta and R. R. Bies, Population pharmacokinetic modeling to estimate the contributions of genetic and nongenetic factors to

- efavirenz disposition. *Antimicrob. Agents Chemother.*, 2017, 61.
17. G. Lurcott, The effects of the genetic absence and inhibition of CYP2D6 on the metabolism of codeine and its derivatives, hydrocodone and oxycodone. *Anesth. Prog.*, 1998, 45, 154–156.
18. C. F. Samer, K. I. Lorenzini, V. Rollason, Y. Daali and J. A. Desmeules, Applications of CYP450 testing in the clinical setting. *Mol. Diagn. Ther.*, 2013, 17, 165–184.
19. J. D. Duarte, C. D. Thomas, C. R. Lee, R. Huddart, J. A. G. Agundez, J. F. Baye, A. Gaedigk, T. E. Klein, D. E. Lanfear, A. A. Monte, M. Nagy, M. Schwab, C. M. Stein, C. R. S. Uppugunduri, R. H. N. van Schaik, R. S. Donnelly, K. E. Caudle and J. A. Luzum, Clinical pharmacogenetics implementation consortium guideline (cpic) for CYP2D6, adrb1, adrb2, adra2c, grk4, and grk5 genotypes and beta-blocker therapy. *Clin. Pharmacol. Ther.*, 2024, 116, 939–947.
20. H. M. Alkreathy, K. M. E. Alsayyid, J. Y. Alaama, K. Al Ghalayini, S. Karim, A. Esmat and Z. A. Damanhour, Bisoprolol responses (pk/pd) in hypertensive patients: A cytochrome p450 (CYP) 2d6 targeted polymorphism study. *Saudi J. Biol. Sci.*, 2020, 27, 2727–2732.
21. J. L. Mega, S. L. Close, S. D. Wiviott, L. Shen, R. D. Hockett, J. T. Brandt, J. R. Walker, E. M. Antman, W. Macias, E. Braunwald and M. S. Sabatine, Cytochrome p-450 polymorphisms and response to clopidogrel. *N. Engl. J. Med.*, 2009, 360, 354–362.
22. H. Y. Jeong, S. H. Baek, S.-J. Chang, M. Yang, S. J. Lee, K. G. Lee and T. J. Park, A hybrid composite of gold and graphene oxide as a PCR enhancer. *RSC Adv.*, 2015, 5, 93117–93121.
23. J.-W. Kim, M. Kim, K. K. Lee, K. H. Chung and C.-S. Lee, Effects of graphene oxide-gold nanoparticles nanocomposite on highly sensitive foot-and-mouth disease virus detection. *Nanomaterials*, 2020, 10, 1921.
24. H. Zhang, C. Peng, A. Li, X. Shi and X. Cao, Effect of antifouling dendrimers and au denps on

the enhancement of PCR amplification. *Can. J. Chem.*, 2017, 95, 942–947.

25. M. Lu, X. Sun, Y. Zhao, L. Zheng, J. Lin, C. Tang, K. Chao, Y. Chen, K. Li, Y. Zhou and J.

Xiao, Low cycle number multiplex PCR: A novel strategy for the construction of amplicon libraries

for next-generation sequencing. *Electrophoresis*, 2024, 45, 1398–1407.
